# Supplementary material for: Potential role of miR-9 and miR-223 in recurrent ovarian cancer
Source: Mol Cancer. 2008 Apr 28;7:35. doi: 10.1186/1476-4598-7-35 (PMC2383925; doi:10.1186/1476-4598-7-35)
Supplement: Additional file 1 — miRNA genes differentially expressed between recurrent and primary serous papillary ovarian adenocarcinomas in the training cohort with their numerical fold changes ranging from 2 to 11. Common miRNA genes highlighted in red have been identified as differentially expressed in diverse cancers. This signifies that specific miRNAs are involved in common molecular pathways. miRNAs highlighted in green were the top dysregulated in recurrent vs primary serous papillary adenocarcinomas in the training cohort. [file 1476-4598-7-35-S1.xls]

## Sheet: Sheet1
	miRNA Assay	Up in Recurrent		miRNA Assay	Up in Recurrent		miRNA Assay	Down in Recurrent
	miR223	11.3557		miR224	3.447		miR326	2.01809
	miR206	10.0924		miR222	3.42953		miR30d	2.13984
	let7i	8.24656		miR29c	3.36303		miR125b	2.14217
	miR30a3p	8.16742		miR21	3.33114		miR31	2.29021
	miR368	8.15286		miR34c	3.15829		miR99a	2.29789
	miR10b	7.72713		miR139	3.14175		miR100	2.31806
	miR338	7.70427		miR197	2.93765		miR137	2.974
	miR195	7.16678		miR15a	2.92899		miR9	3.88646
	miR93	5.84948		miR218	2.88362
	miR23a	5.51431		miR106a	2.8151
	miR185	5.2657		miR340	2.80769
	miR22	5.14929		miR219	2.79736
	miR339	4.92521		miR155	2.71043
	miR321	4.81249		miR92	2.70106
	miR29b	4.77821		let7g	2.60671
	miR186	4.47989		miR328	2.60141
	miR128a	4.42676		miR149	2.4419
	miR374	4.36903		miR23b	2.42727
	miR193	4.0021		miR221	2.38928
	miR106b	3.9719		miR150	2.28417
	miR194	3.84051		miR190	2.14926
	miR370	3.76951		miR107	2.10618
	miR128b	3.5362		miR331	2.09149
	miR198	3.4935		miR181c	2.07206
				miR133b	2.02573
